# Supplementary material
Source: PubMed Central journal article supplement (PMC4663172)

# Fig. 1

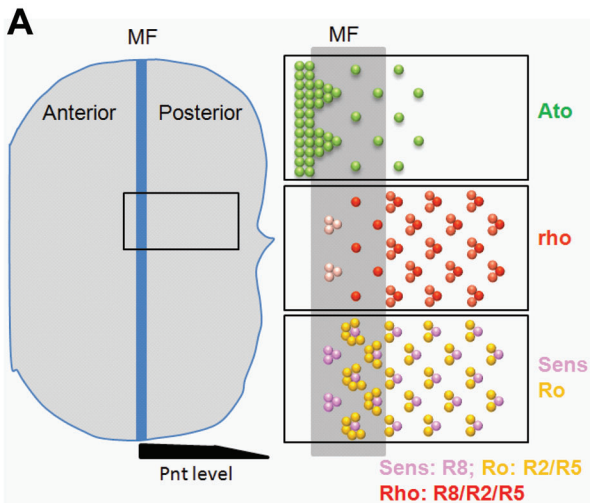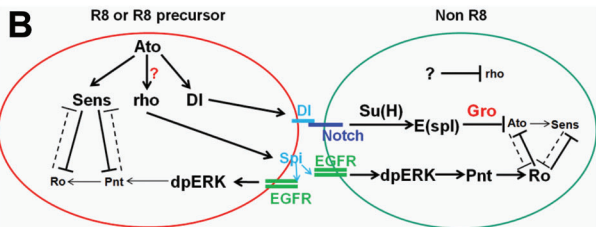

**Fig. 2**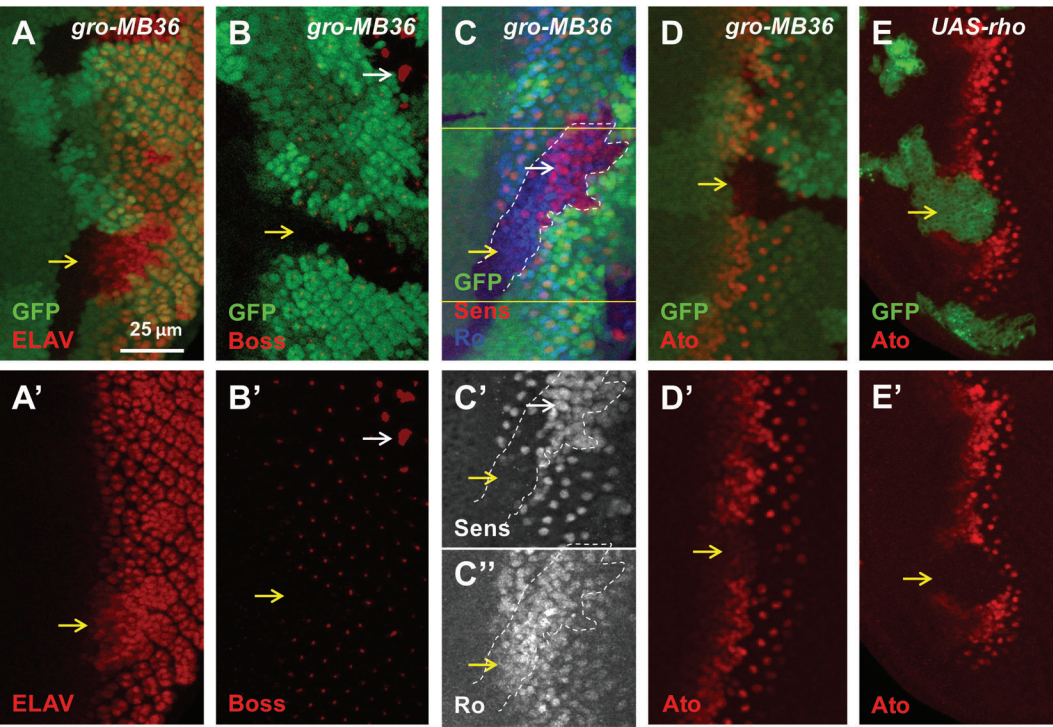

**Fig. 3**

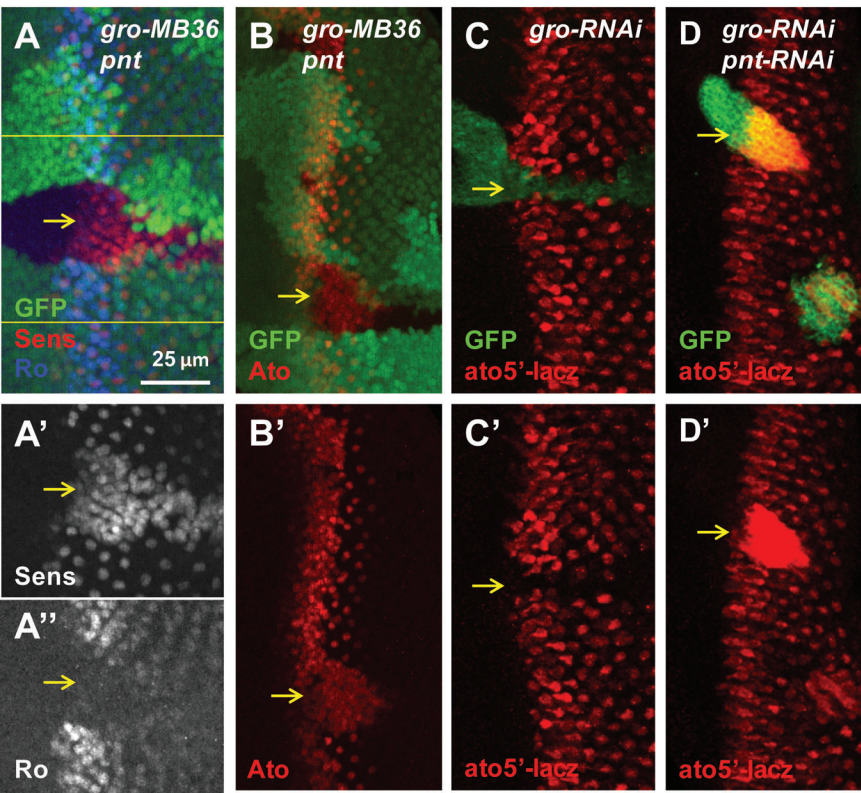

**Fig. 4**

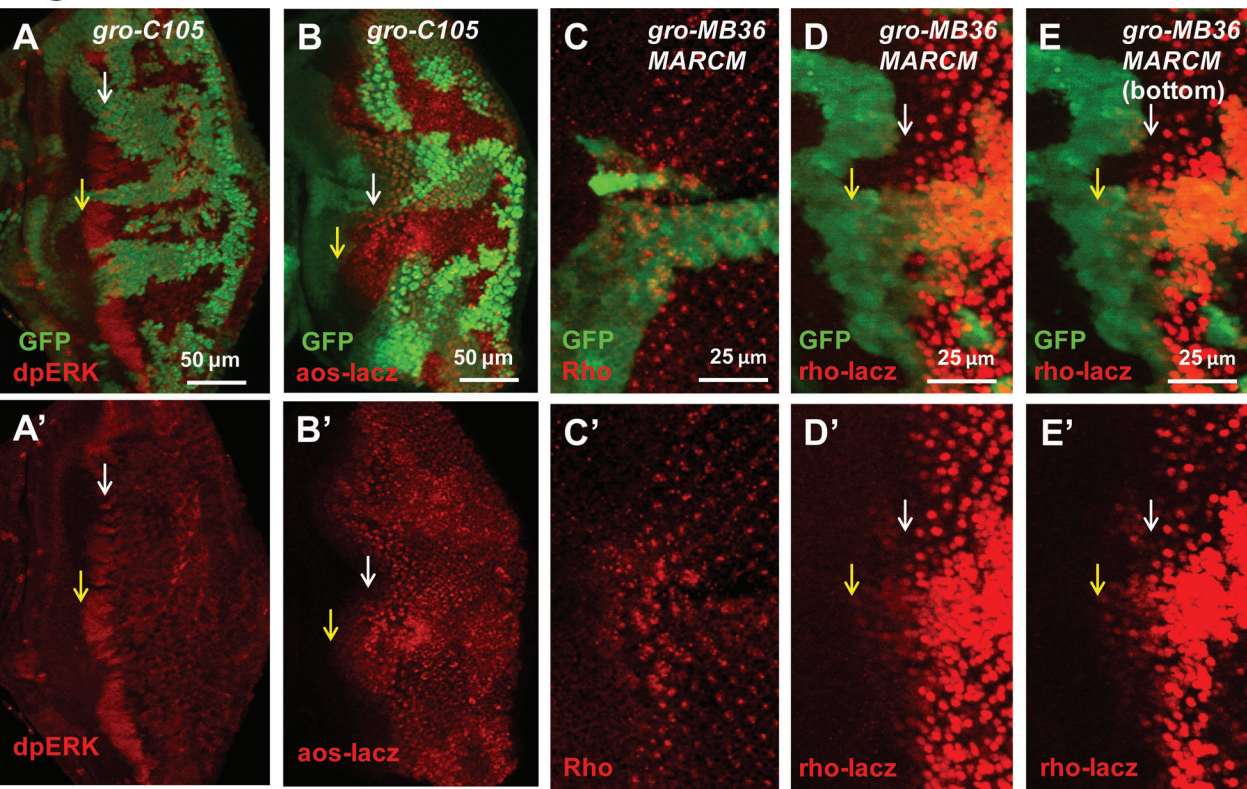



**Fig. 5**

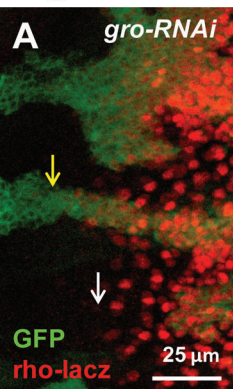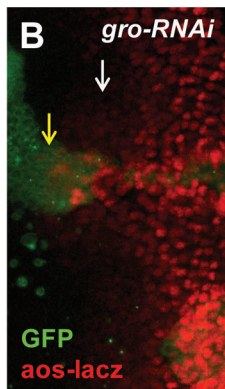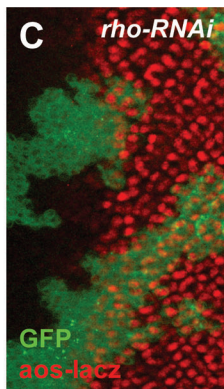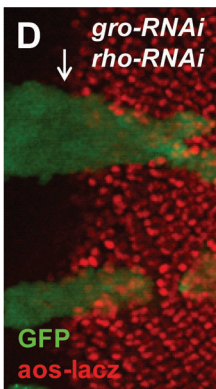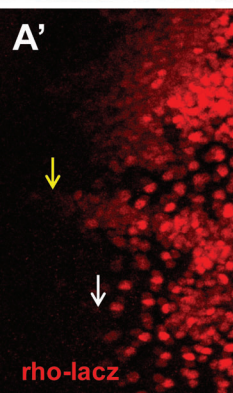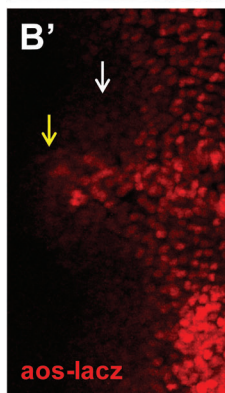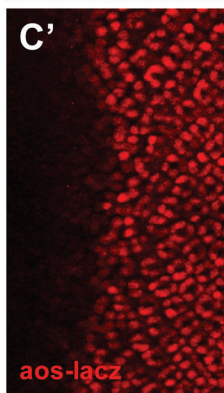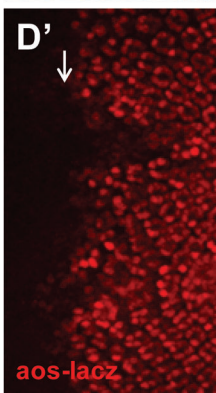

**Fig. 6****A**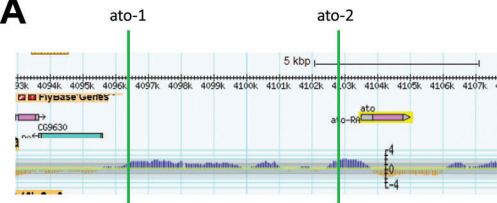**B**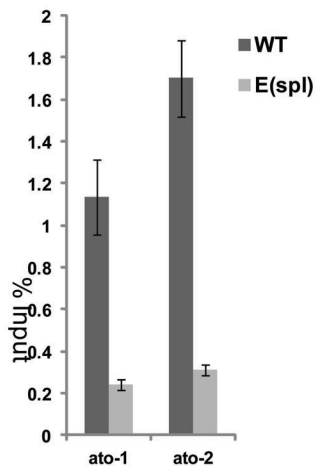**C**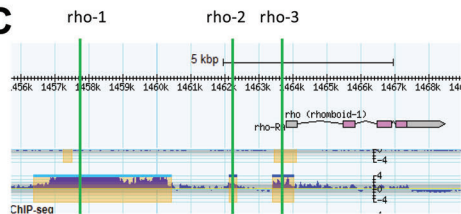**D**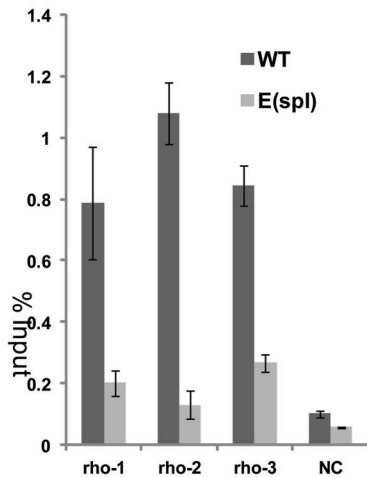

**Fig. 7**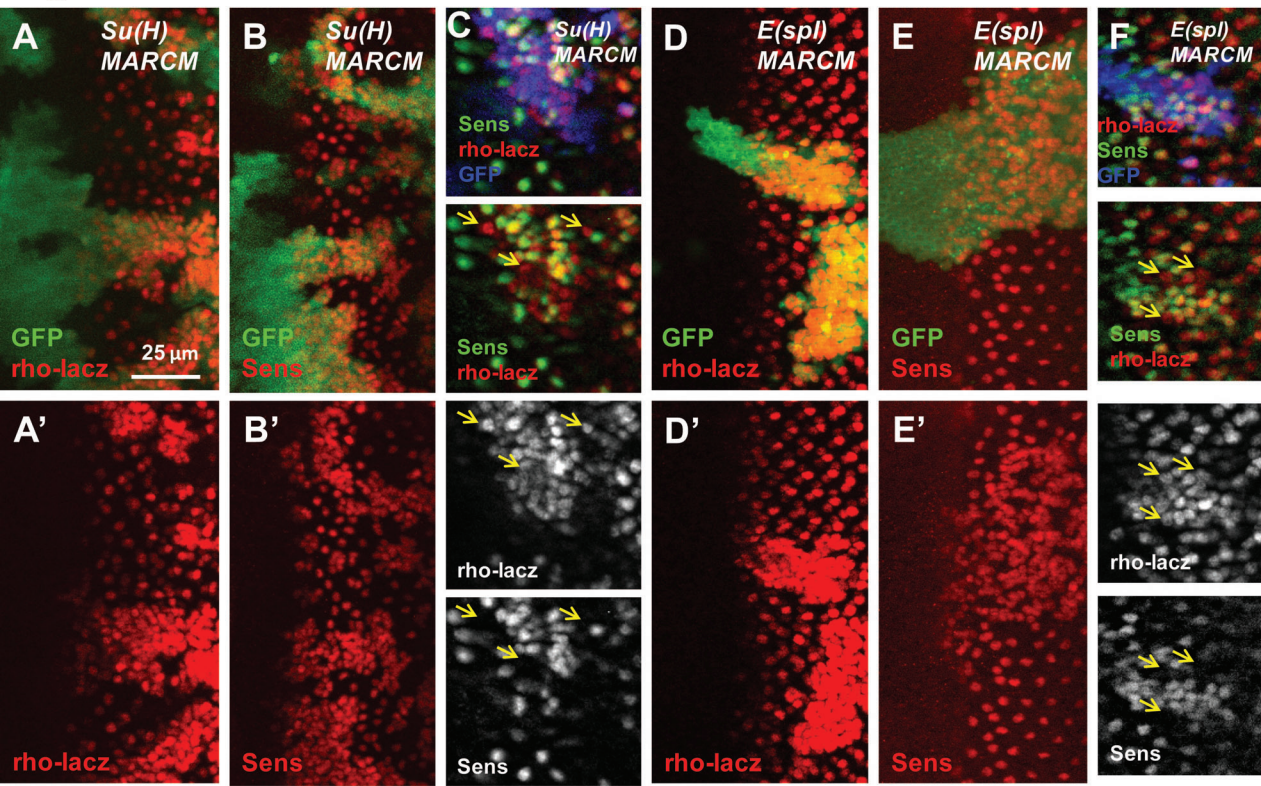



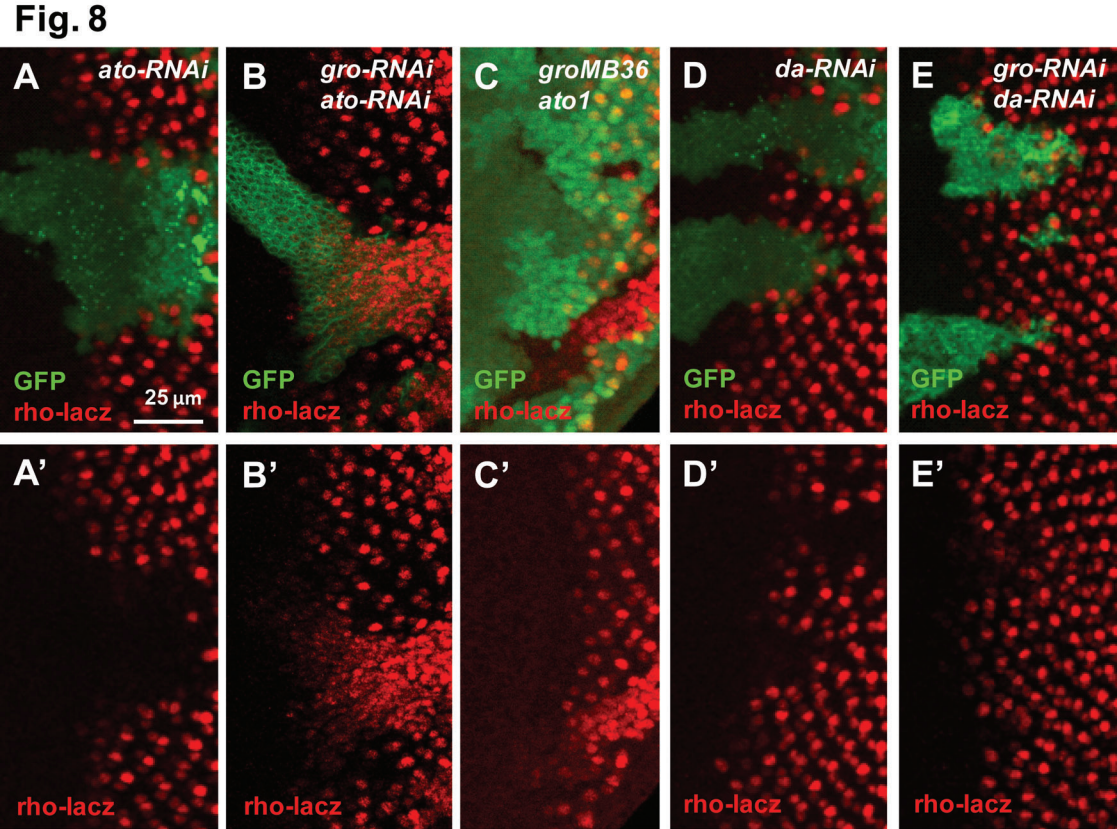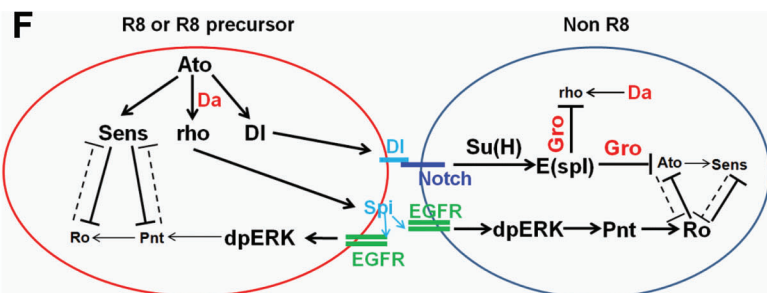



**Fig. S1**

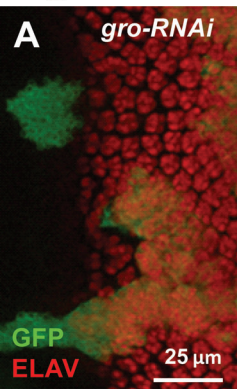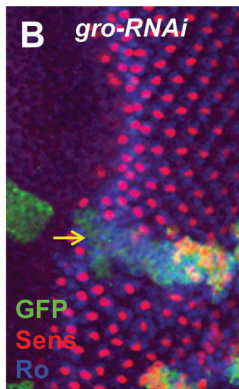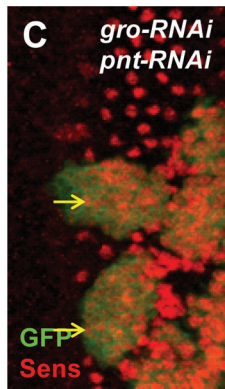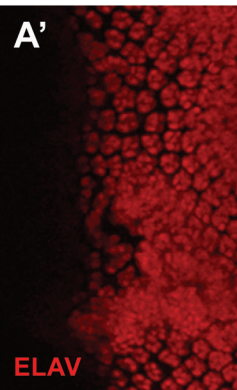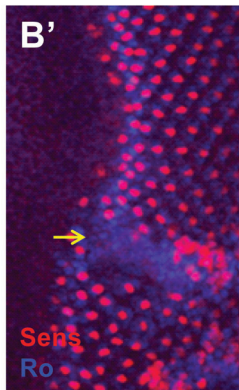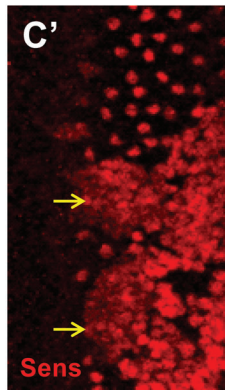

# Fig. S2

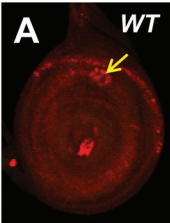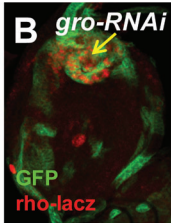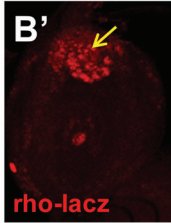

# Fig. S3

## Da chip-chip data

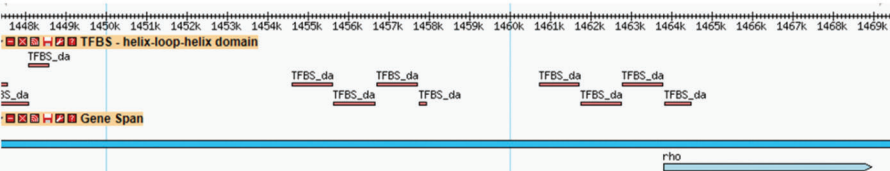

Supplement: NIHMS728933-supplement.pdf [file NIHMS728933-supplement.pdf]
